# Supplementary material
Source: PubMed Central journal article supplement (PMC8758804)

Supplementary Figure 2a-g: Boxplots of variables significantly ( $p < 0.05$ ) associated with CRP quartiles in  $n=108$  adult Samoans

a.

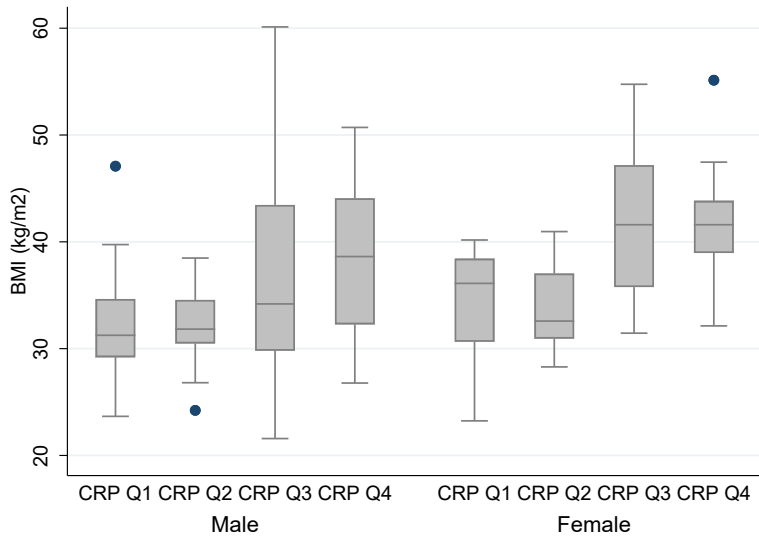

b.

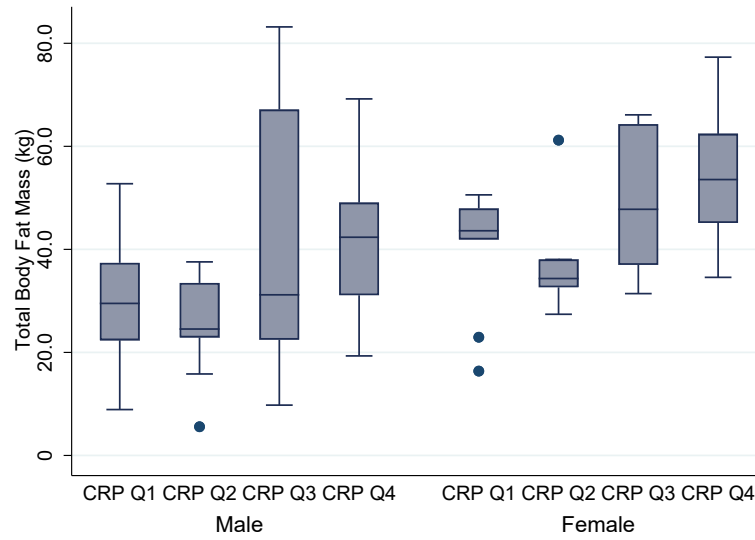

c.

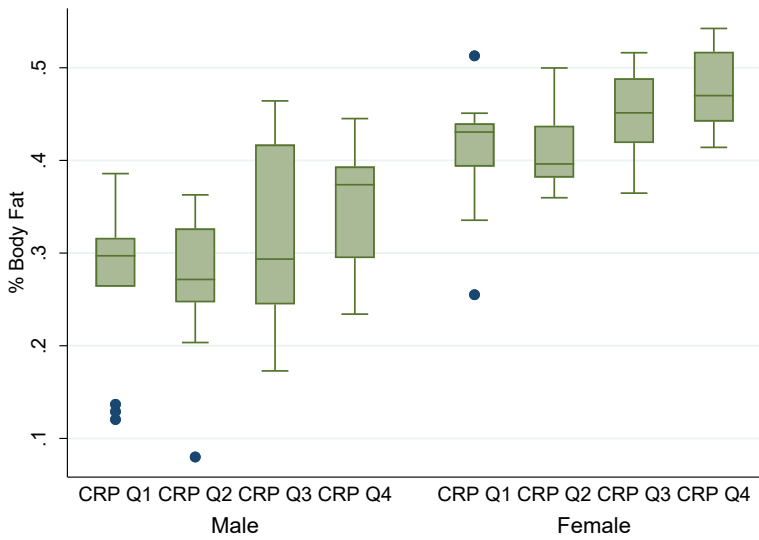

d.

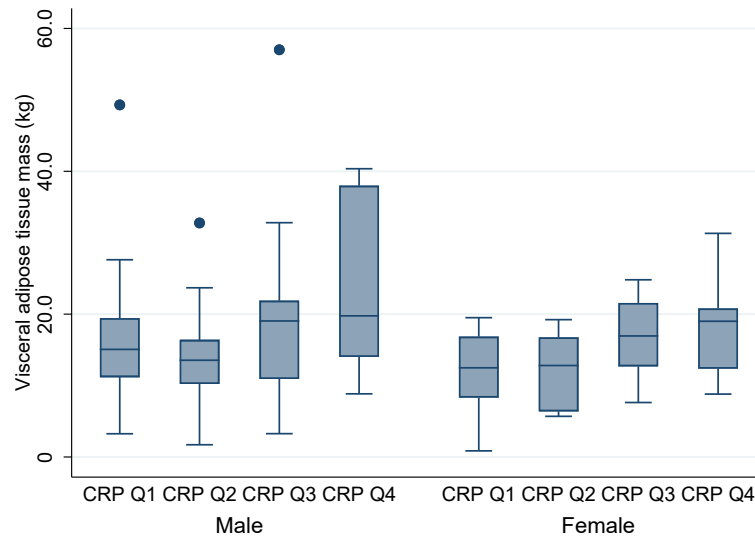

e.

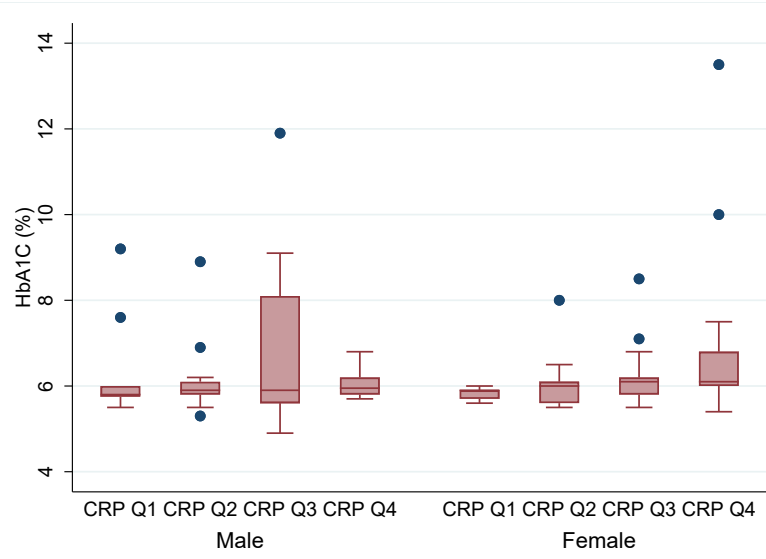

f.

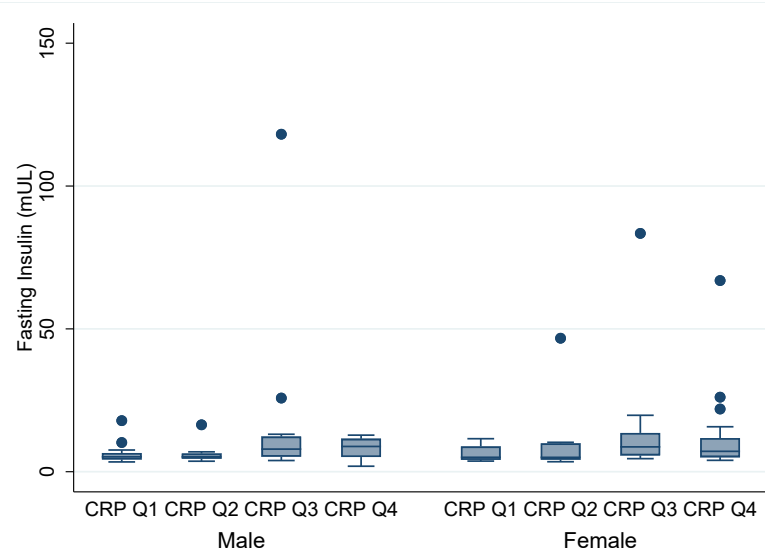

g.

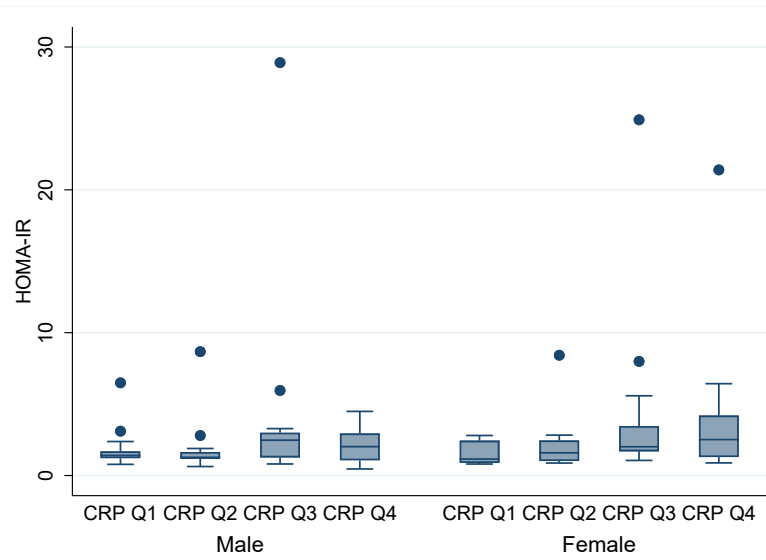

Supplement: NIHMS1720938-supplement-f2.pdf [file NIHMS1720938-supplement-f2.pdf]
